# Supplementary material for: FaAKR23 Modulates Ascorbic Acid and Anthocyanin Accumulation in Strawberry (Fragaria × ananassa) Fruits
Source: MDPI journal article supplement (doi:10.3390/antiox11091828), 2022-09-16
Supplement: s1 [file s1]

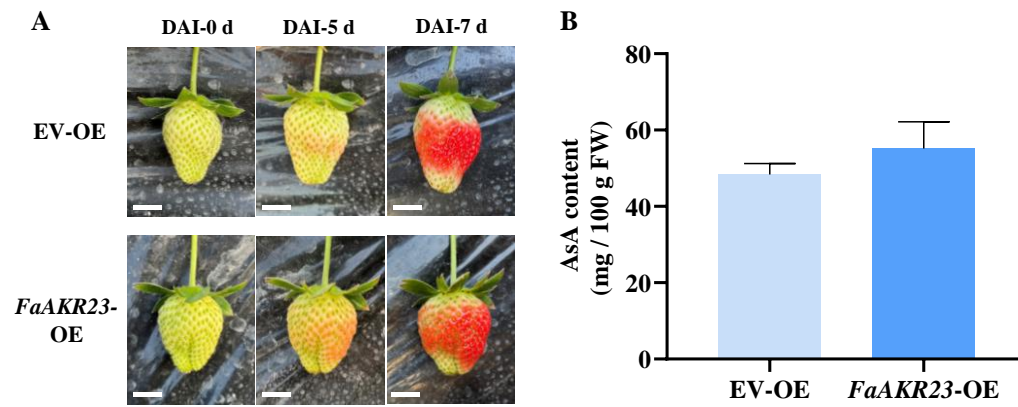

**Supplemental Figure S1.** Transient overexpression of *FaAKR23* in strawberry fruits. **(A)** Phenotypes of EV-OE and *FaAKR23*-OE fruits, EV, empty vector, Bars: 1 cm. **(B)** AsA content in EV-OE and *FaAKR23*-OE fruits.

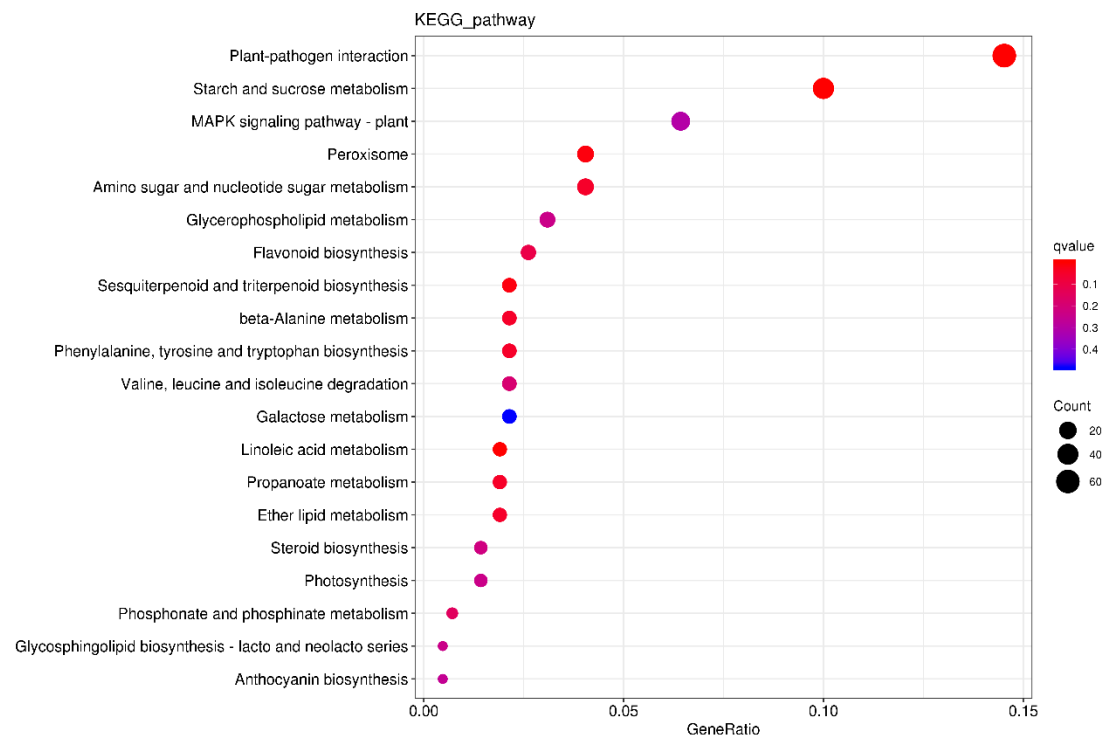

**Supplemental Figure S2.** Kyoto Encyclopedia of Genes and Genomes (KEGG) classification of DEGs in EV-RNAi and *FaAKR23*-RNAi fruits.

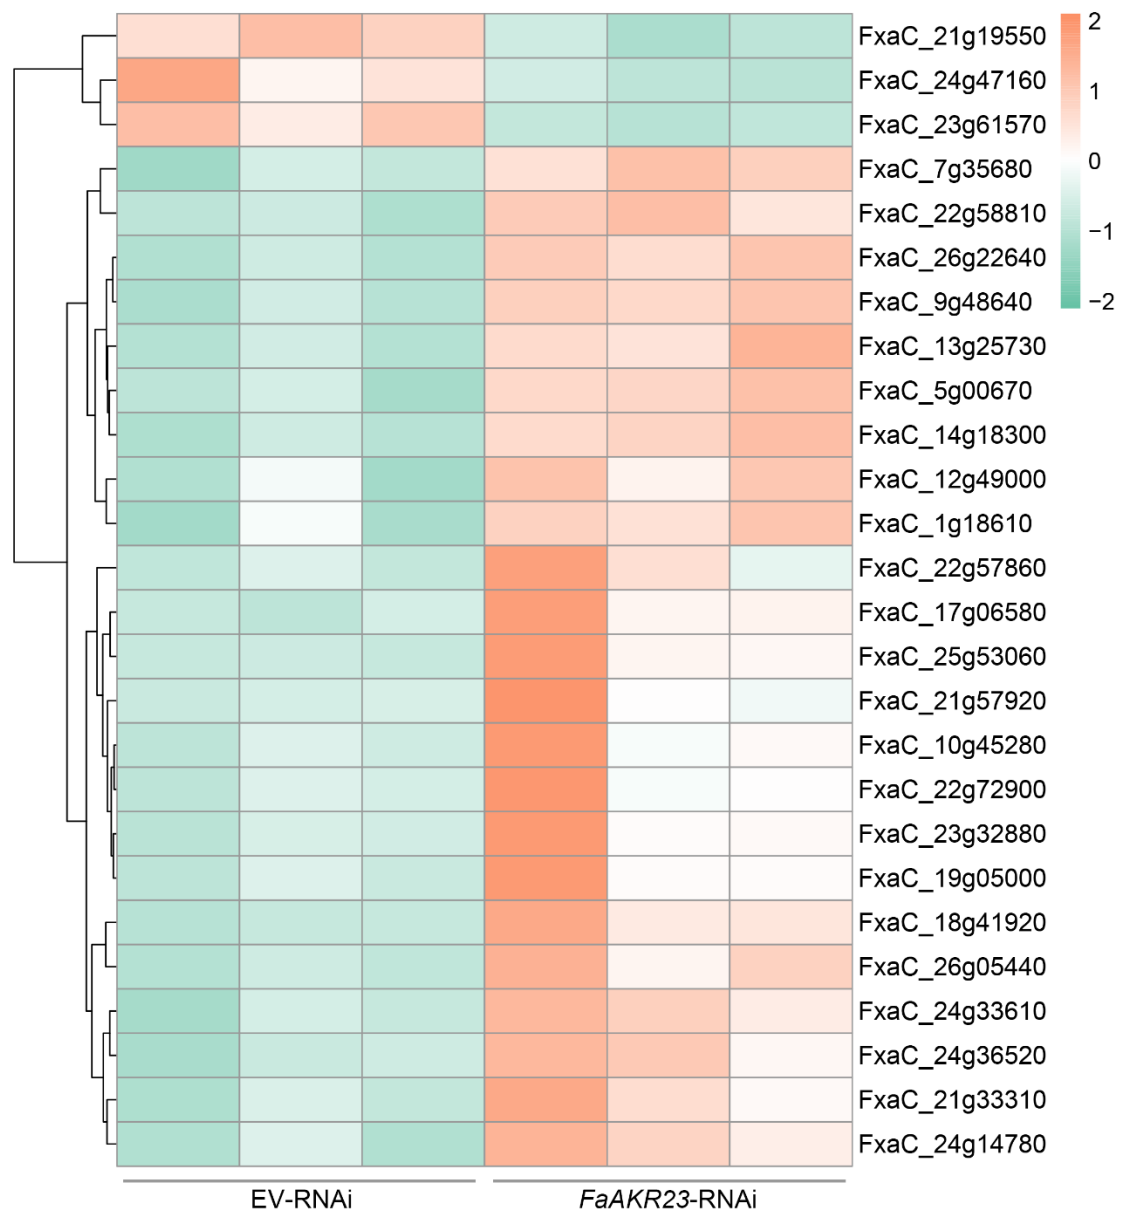

**Supplemental Figure S3.** Transcriptome expression heatmap of *FaWRKYs* in EV-RNAi and *FaAKR23*-RNAi fruits
